# Supplementary material
Source: MDPI journal article supplement (https://www.mdpi.com/2504-5377/6/4/75)
Supplement: s1 [file s1 › colloids-1926092-supplementary.pdf]

## Article

# Production of Graphene Stably Dispersible in Ethanol by Microwave Reaction

Alberto Martis <sup>1,2,\*</sup>, Marco Fontana <sup>1,2</sup>, Mara Serrapede <sup>1,2</sup>, Stefano Bianco <sup>2</sup>, Angelica Chiodoni <sup>1</sup>, Candido Fabrizio Pirri <sup>1,2</sup> and Sergio Bocchini <sup>1,2,\*</sup>

<sup>1</sup> Center for Sustainable Future Technologies (CSFT)@Polito, Istituto Italiano di Tecnologia, Via Livorno 60, 10144 Torino, Italy

<sup>2</sup> Department of Applied Science and Technology—DISAT, Politecnico di Torino, Corso Duca degli Abruzzi 24, 10129 Torino, Italy

\* Correspondence: alberto.martis@iit.it (A.M.); sergio.bocchini@polito.it (S.B.); Tel.: +39-388-1712571 (S.B.)

All sample was analyze with Thermo-gravimetric coupled infrared absorption analyses (TGA-IR) were carried out in a Thermo-gravimetric Analyzer NETZSCH TG 209 F1 coupled by a transfer line heated at 230 °C with an Infrared spectrometer Bruker TENSOR II equipped with an IR gas cell heated at 200 °C. The tests were performed heating from 30 °C to 800 °C with a rate of 20 °K min<sup>-1</sup> about 3 mg sample in alumina pans, under nitrogen flux of 40 mL min<sup>-1</sup>. Before the test three vacuum cycle were performed to purge from air and remove solvent impurities on the surface of the materials. Experimental weight error, is between ±1%. The FTIR analysis was collected in the absorbance mode in the range 650–4400 cm<sup>-1</sup>. Every sample has a starting weight between 2 mg and 3 mg.

**Citation:** Martis, A.; Fontana, M.; Serrapede, M.; Bianco, S.; Chiodoni, A.; Pirri, C.F.; Bocchini, S. Production of Graphene Stably Dispersible in Ethanol by Microwave Reaction. *Colloids Interfaces* **2022**, *6*, x. <https://doi.org/10.3390/xxxxx>

Academic Editor: Victor Starov

Received: 4 September 2022

Accepted: 28 November 2022

Published: 5 December 2022

**Publisher's Note:** MDPI stays neutral with regard to jurisdictional claims in published maps and institutional affiliations.

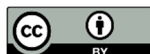

**Copyright:** © 2022 by the authors. Submitted for possible open access publication under the terms and conditions of the Creative Commons Attribution (CC BY) license (<https://creativecommons.org/licenses/by/4.0/>).

**Graphite.**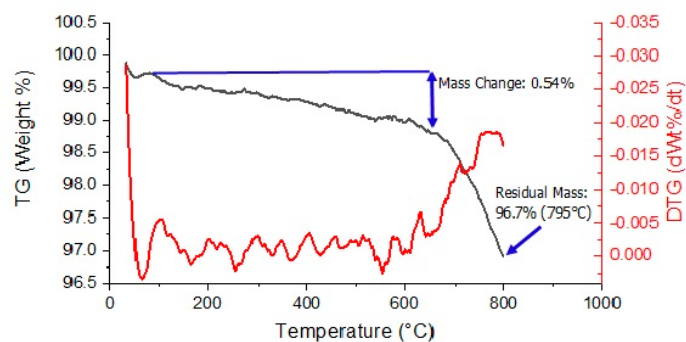

(a)

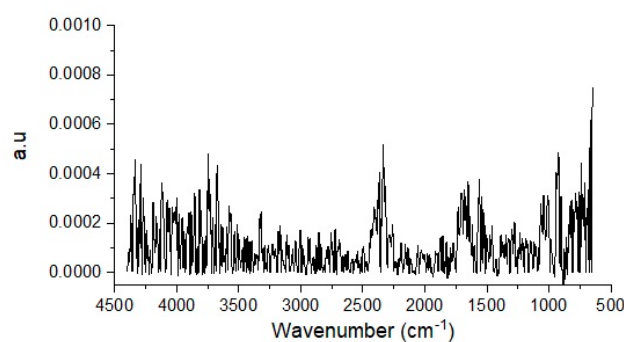

(b)

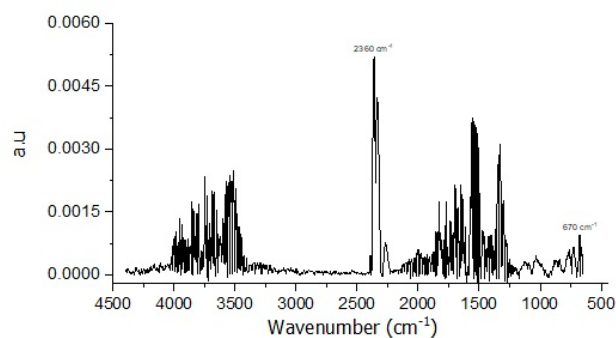

(c)

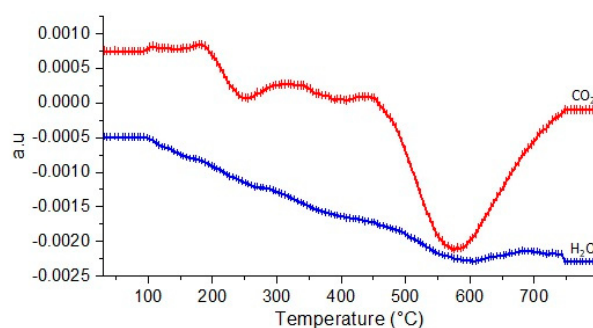

(d)

**Figure S1.** (a) Thermal degradation of graphite (b) Gas infrared spectra correlated with the degradation of graphite at 380°C (c) the gas infrared spectra correlated with the final degradation at 798 °C and (d) the kinetics devolution of CO<sub>2</sub> and H<sub>2</sub>O during the heating

## Graphene

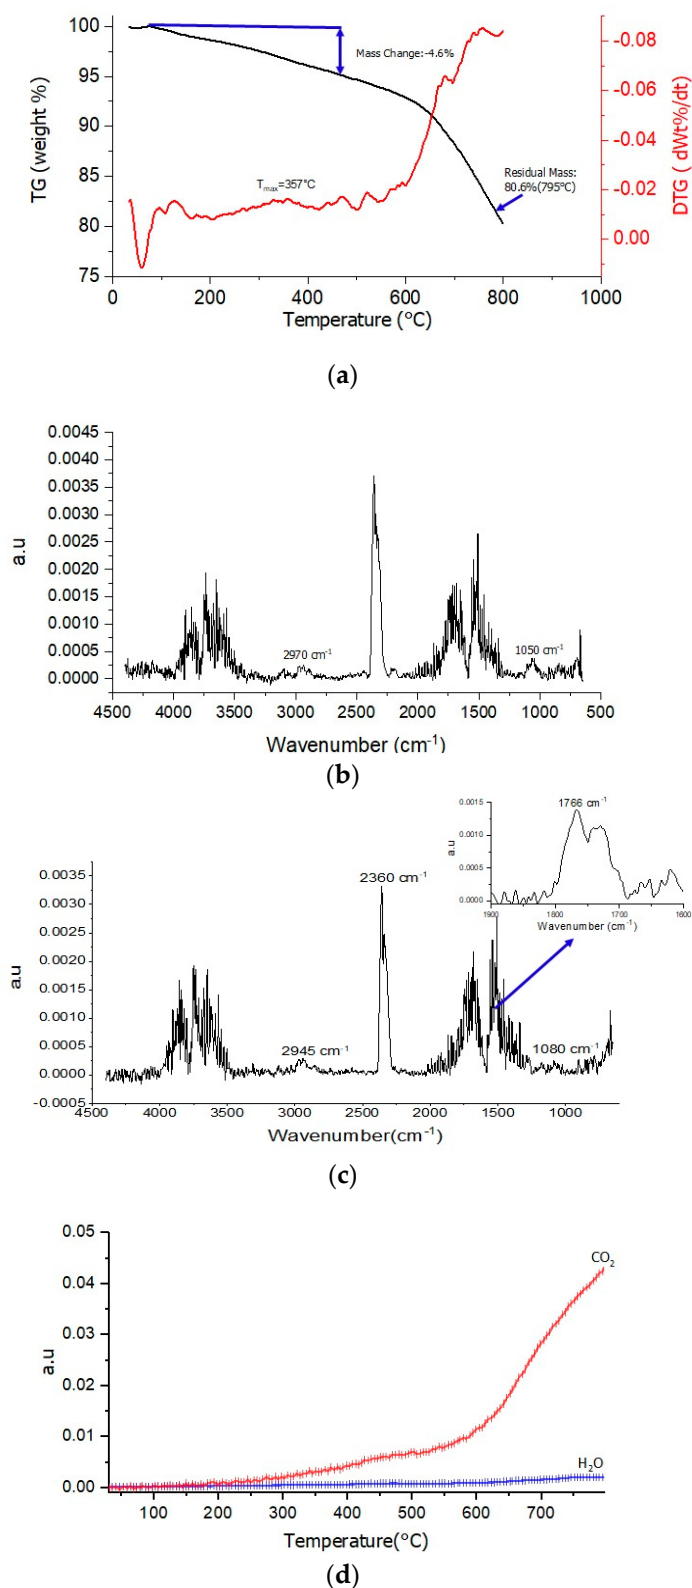

**Figure S2.** (a) Thermal degradation of exfoliated graphene(EG) (b) Gas infrared spectra correlated with the degradation of EG at 380 °C, (c) the gas infrared spectra correlated with the final degradation at 798 °C and (d) the kinetics devolution of  $\text{CO}_2$  and  $\text{H}_2\text{O}$  during the heating of the sample

### GEM reaction with AIBN (Azobisisobutyronitrile)

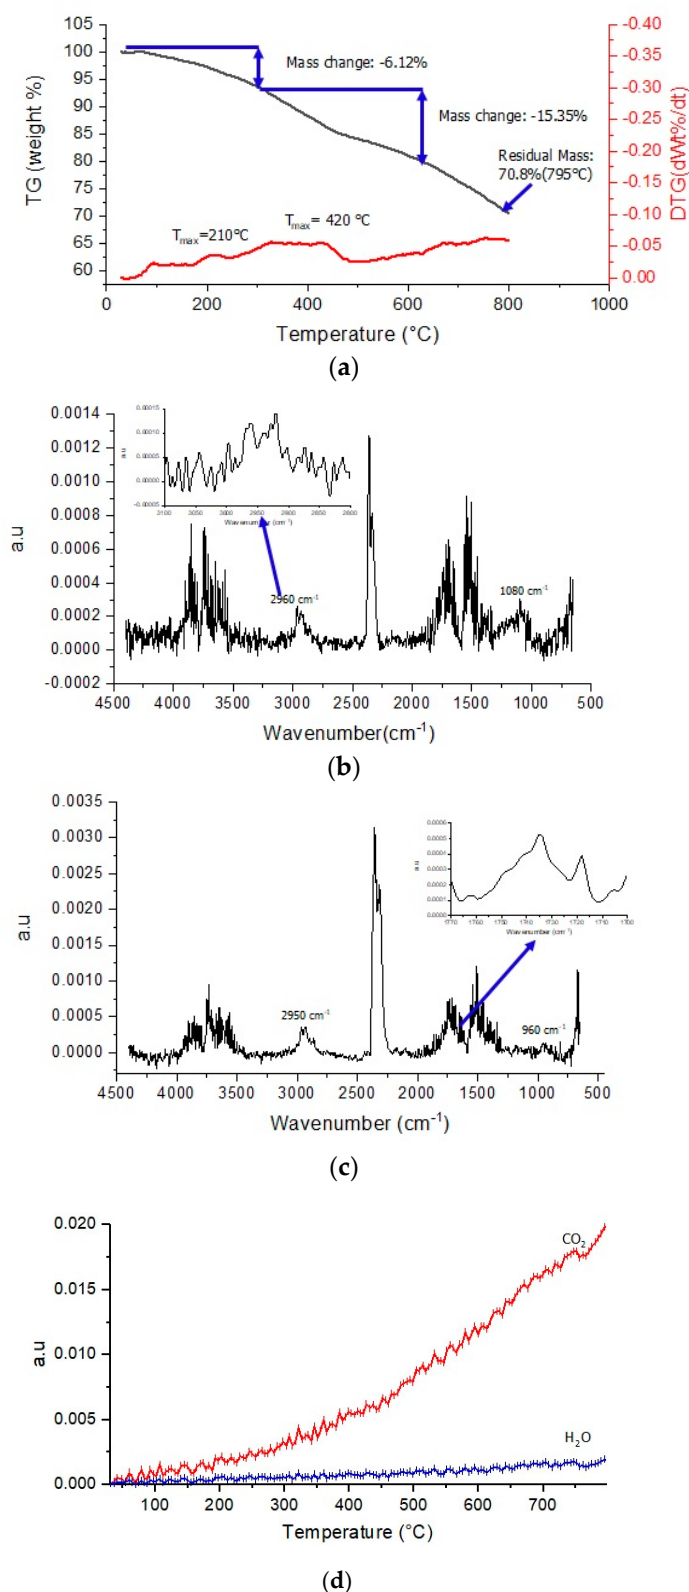

**Figure S3.** (a) Thermal degradation of graphene ethyl maleate (GEM) made with the adding of AIBN (b) Gas infrared spectra correlated with the degradation of GEM at 220 °C with (inside caption) the peak observed with the subtraction of water, (c) 420 °C with the peak observed with (inside the caption) the subtraction of water and (d) the kinetics devolution of CO<sub>2</sub> and H<sub>2</sub>O during the heating of the sample.

### ADDITIONAL FESEM CHARACTERIZATION

Figure S4 provides additional FESEM images of exfoliated graphene before and after the modification with maleate, confirming the findings discussed in the main manuscript.

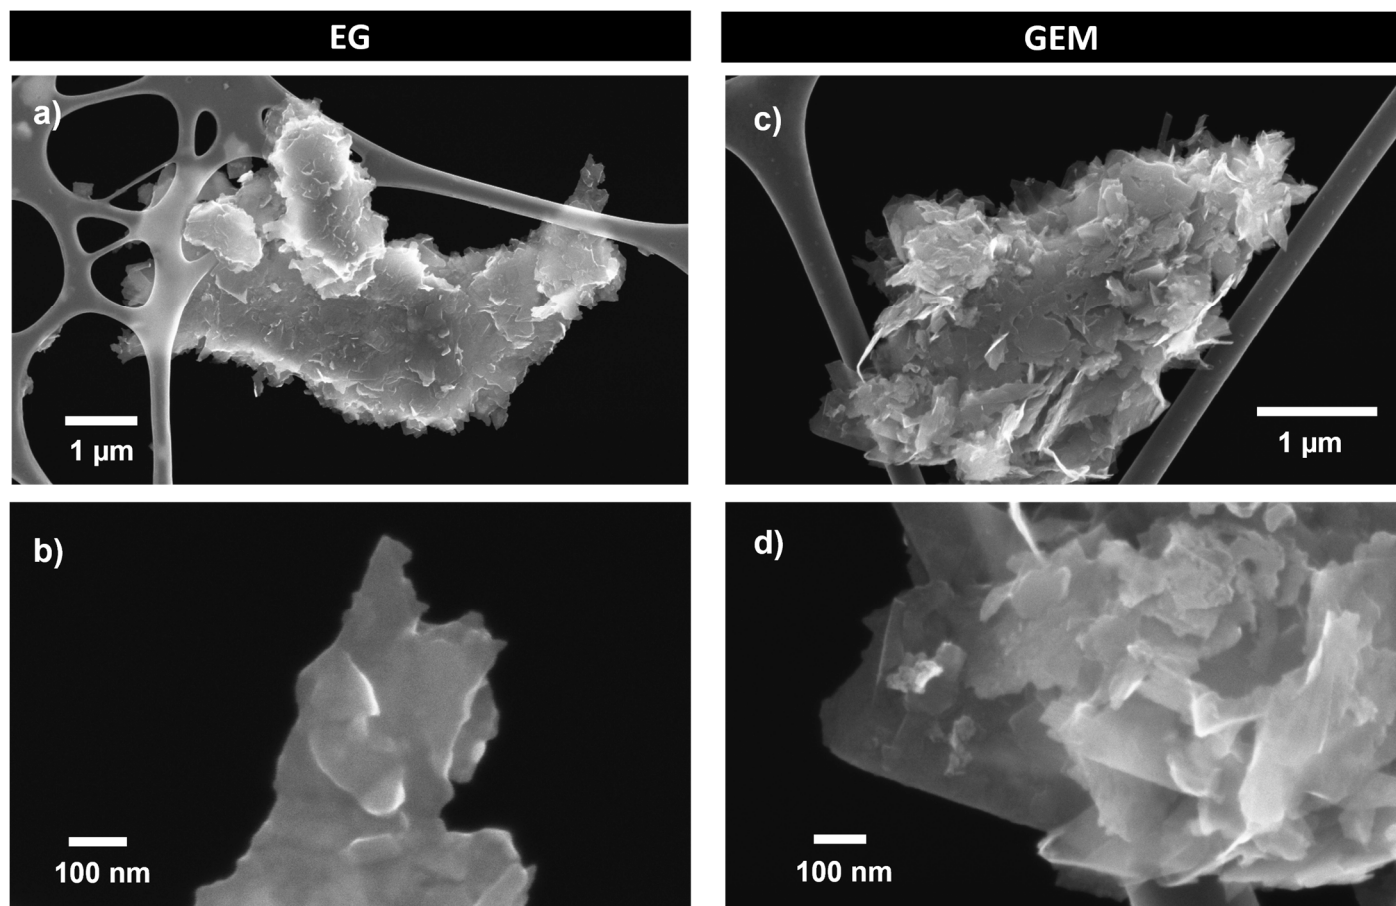

**Figure S4.** Field-emission Scanning Electron Microscopy images at different magnifications showing exfoliated graphene (EG) (a,b) and graphene modified with maleate (GEM) (c,d) on lacey carbon membranes.

## ADDITIONAL XPS CHARACTERIZATION

Figure S5 provides XPS survey spectra of exfoliated graphene before and after the modification with maleate. Si-containing contamination is probably due to silicon oil probably present on the lab as vapor contamination.

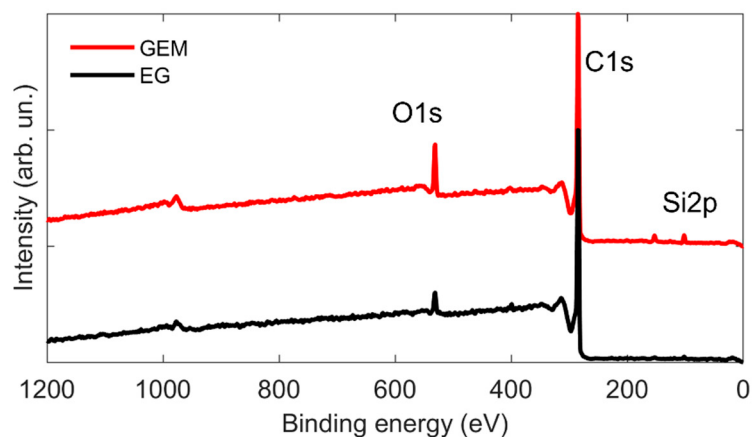

| Sample | C (at%)    | O (at%)   | Si (at%)  |
|--------|------------|-----------|-----------|
| EG     | 95.4 ± 0.3 | 4.2 ± 0.3 | 0.4 ± 0.1 |
| GEM    | 89.2 ± 0.3 | 8.8 ± 0.3 | 2.0 ± 0.1 |

**Figure S5:** X-ray Photoelectron spectroscopy survey spectrum for exfoliated graphene and GEM, alongside semi-quantitative analysis, reported in the table. Uncertainties on relative atomic concentrations were calculated using Monte Carlo routines provided in CasaXPS software.

### UV Calibration Curve

The uv was performed on a dispersion of Exfoliated graphene in ethanol with a concentration of  $4 \times 10^{-5} \text{ mg mL}^{-1}$ ,  $2 \times 10^{-4} \text{ mg mL}^{-1}$ ,  $4 \times 10^{-4} \text{ mg mL}^{-1}$ .

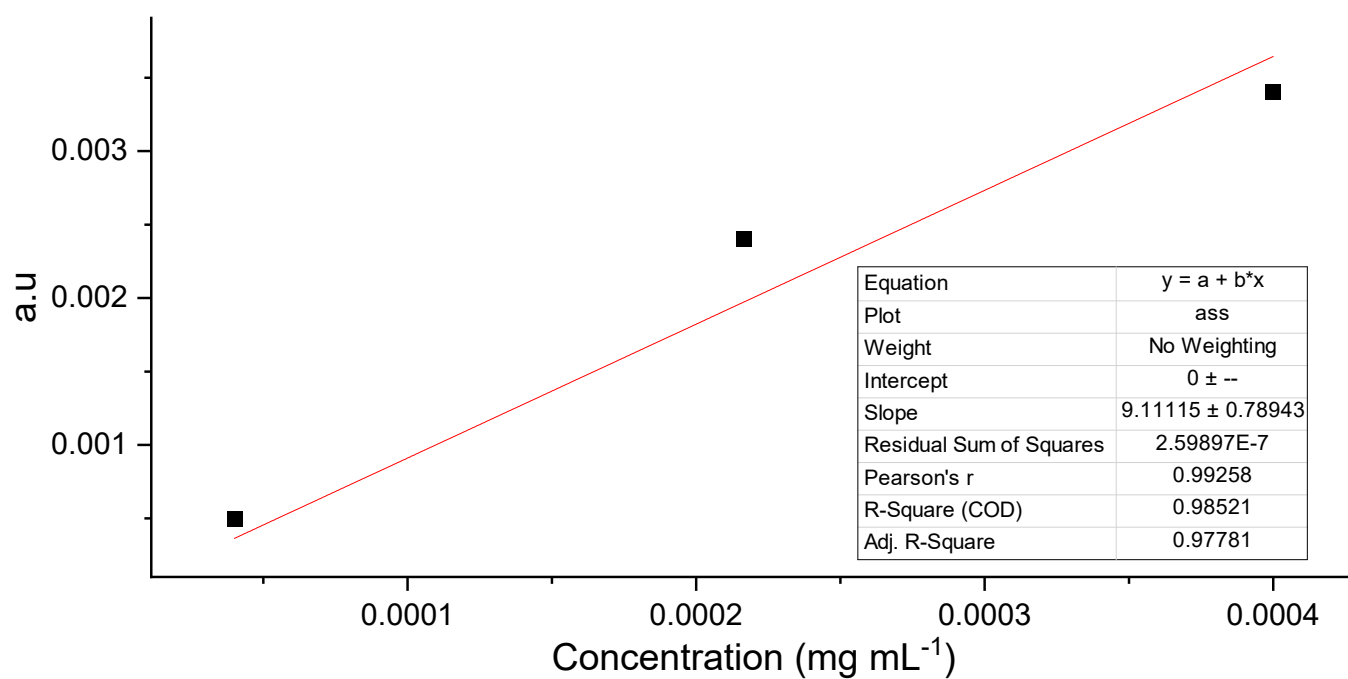

**Figure S6.** Calibration curve of exfoliated graphene in ethanol.

**Table S1** Legend

| <b>Name</b>                              | <b>Abbreviation</b> |
|------------------------------------------|---------------------|
| Exfoliated Graphene                      | EG                  |
| Graphene diethyl maleate                 | GEM                 |
| Azobisisobutyronitrile                   | AIBN                |
| n-methyl pyrrolidone                     | NMP                 |
| Dimethyl formamide                       | DMF                 |
| Dimethyl sulfoxide                       | DMSO                |
| Graphene colloidal                       | GC                  |
| Graphene composite Polyvinyl pyrrolidone | G-PVP               |
